# Supplementary material for: Fabrication of hypoxia-responsive and uperconversion nanoparticles-modified RBC micro-vehicles for oxygen delivery and chemotherapy enhancement
Source: Royal Society of Chemistry journal article supplement (doi:10.1039/d0bm00678e), 2020-01-01
Supplement: d0bm00678e1.pdf [file d0bm00678e1.pdf]

# **Hypoxia-responsive and uperconversion nanoparticles modified RBC micro-vehicles fabrication for oxygen delivery and chemotherapy enhancement**

Peiyuan Wang,<sup>a,b,c,d</sup> Suhua Jiang,<sup>a,c,d</sup> Yang Li,<sup>a,c,d</sup> Qiang Luo,<sup>a,c,d</sup> Jinyan Lin,<sup>a,c,d</sup> Lidan

Hu,<sup>e</sup> Congjian Xu,<sup>b</sup> Jun Zhu,<sup>f,\*</sup> and Lingling Fan<sup>b,\*</sup>

- a. Key Laboratory of Design and Assembly of Functional Nanostructures, Fujian Institute of Research on the Structure of Matter, Chinese Academy of Sciences, Fuzhou 350002, P. R. China.
  - b. Obstetrics and Gynecology Hospital of Fudan University, Shanghai 200011, P. R. China.
  - c. The United Innovation of Mengchao Hepatobiliary Technology Key Laboratory of Fujian Province, Mengchao Hepatobiliary Hospital of Fujian Medical University, Fuzhou 350025, P. R. China.
  - d. Department of Translational Medicine, Xiamen Institute of Rare Earth Materials, Chinese Academy of Sciences, Xiamen 361024, P. R. China.
  - e. Hunan Province Cooperative Innovation Center for Molecular Target New Drug Study, Department of Biochemistry and Molecular Biology, University of South China, Hengyang 421001, P. R. China.
  - f. Department of Oncology, Shanghai Pulmonary Hospital, Tongji University School of Medicine
- Email addresses: *fanlg@hotmai.com*, *rotor121@sina.com*

## Part A: Experimental Section

### 1. Materials and characterization

**Materials.** All solvents used were of analytical grade without further purification. Gadolinium (III) chloride anhydrous ( $\text{GdCl}_3$ , 99.99 %), ytterbium (III) chloride anhydrous ( $\text{YbCl}_3$ , 99.9 %), thulium (III) chloride anhydrous ( $\text{TmCl}_3$ , 99.9 %), sodium trifluoroacetate (Na-TFA, 98 %), 1-octadecene (ODE, 90 %), oleic acid (OA, 90 %), Rose Bengal and hexanoic acid were supplied by Sigma Aldrich. Poly (ethylene glycol)–distearoyl phosphatidylethanolamine, ( $\text{DSPE-PEG}_{2000}\text{-NH}_2$ ) and 1,2-distearoyl-sn-glycero-3-phosphoethanolamine-N-[biotinyl(polyethylene glycol)-2000] (ammonium salt) ( $\text{DSPE-PEG}_{2000}\text{-biotin}$ ) were purchased from Avanti Polar Lipids. The FSH (Arg-Gly-Asp) peptides were purchased from Shanghai Qiangyao Biotechnology Co., Ltd.

**Characterization.** Transmission electron microscopy (TEM) measurements were carried out on a JEM 2100F microscope (Japan) operated at 200 kV. The samples were first dispersed in ethanol and then collected by using copper grids covered with carbon films for measurements. Scanning electron microscopic (SEM) images were obtained on a Philip XL30 microscope (Germany). A thin gold film was sprayed on the samples before characterization. UV–vis–NIR absorption spectra were measured on a Shimadzu spectrophotometer (UV-3150) (Japan) with wavelength range of 300-1200 nm. The fluorescence spectra were recorded on Edinburgh Fluorescence Spectrometer FLS980 instrument with excitation source were using external 980-nm semiconductor laser

(Changchun New Industries Optoelectronics Tech. Co., Ltd.), unless otherwise specified, all spectra were collected under identical experimental conditions. Visible Fluorescence spectra were recorded on Edinburgh Fluorescence Spectrometer FLS980 instrument with Xenon lamp as excitation source.

## **2. Synthesis of lanthanide doped core-shell structured NaGdF<sub>4</sub>:Yb, Tm@NaGdF<sub>4</sub> up-conversion nanoprobe.**

### ***Preparation of shell precursors for the synthesis of up-conversion nanoparticles***

***Gd-OA (0.10 M) host precursor:*** a mixture of GdCl<sub>3</sub> (2.50 mmol), OA (10.0 mL), and ODE (15.0 mL) was loaded in a reaction container and heated at 140 °C under vacuum with magnetic stirring for 30 min to remove residual water and oxygen. Then the colorless Gd-OA precursor solution (0.10 M) was obtained.

***Yb-OA, Tm-OA (0.1 M):*** The synthesis of Yb-OA and Tm-OA precursor was carried out all the same as that of Gd-OA except 2.50 mmol of YbCl<sub>3</sub>, 2.50 mmol of TmCl<sub>3</sub>, were used instead of 2.5 mmol of GdCl<sub>3</sub>, respectively.

***Na-TFA-OA (0.20 M) precursor:*** A mixture of Na-TFA (2.00 mmol) and OA (10.0 mL) was added into a container at room temperature under vacuum with magnetic stirring to remove residual water and oxygen. Then the colorless Na-TFA-OA precursor solution (0.20 M) was obtained.

***Synthesis of NaGdF<sub>4</sub>:Yb,Tm@NaGdF<sub>4</sub> UCNPs with a diameter of 40 nm:*** in a typical procedure for the synthesis of NaGdF<sub>4</sub>: 20 % Yb, 0.3 % Tm nanocrystals, 0.797 mmol of anhydrous GdCl<sub>3</sub>, 0.20 mmol of YbCl<sub>3</sub> and 0.003 mmol of ErCl<sub>3</sub> were added

to a 100-mL flask containing 10 mL of oleic acid and 15 mL of 1-octadecene. The mixture was heated at 150 °C for 30 min before cooling down to 50 °C to remove the water content from the solution. Shortly thereafter, 10 mL of methanol solution containing  $\text{NH}_4\text{F}$  (2.75 mmol) and  $\text{NaOH}$  (2.5 mmol) was added and the resultant solution was stirred for 30 min to remove the methanol. After the methanol was evaporated, the solution was heated to 300 °C under argon for 1 h and then cooled down to room temperature. The resulting 15-nm  $\text{NaGdF}_4\text{:Yb,Tm}$  nanoparticles were precipitated by addition of ethanol, collected by centrifugation at 6000 rpm for 5 min, washed with ethanol several times, and re-dispersed in 10 mL of cyclohexane. Then, 2.5 mL of the purified  $\text{NaGdF}_4\text{:Yb,Tm}$  initial core solution was mixed with 4.0 mL of OA and 6.0 mL of ODE. The flask was pumped at 70 °C for 30 min to remove cyclohexane and residual air. Subsequently, the system was switched to air flow and the reaction mixture was further heated to 280 °C at a rate of  $\sim 20$  °C/min. Then Gd-OA (0.1 M, 1.0 mL) and Na-TFA-OA (0.20 M, 1 mL) host shell precursors were alternately introduced by dropwise addition at 280 °C and the time interval between each injection was 15 min. There are eight groups of Gd-OA and Na-TFA-OA. Finally, the obtained  $\text{NaGdF}_4\text{:Yb,Tm}@ \text{NaGdF}_4$  homogeneously doping cores were centrifuged and washed as above and dispersed in cyclohexane.

### **3. Synthetic procedures of hypoxia probe**

*tert-butyl(2-aminoethyl)carbamate (5)*

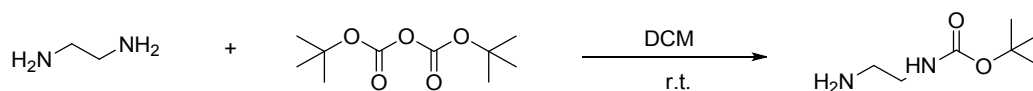

**5**

1,2-Diaminoethane (11.95 g, 198.77 mmol) was added into a 1000 mL round-bottomed flask containing dichloromethane (50 mL). Di-tert-butyl dicarbonate (7.23 g, 33.13 mmol), pre-dissolved in dichloromethane (400 mL), was added slowly to the above reaction mixture under stirring at room temperature over a period of 6 h. After reacting for 12 h, the solution was filtered to remove the resulting white precipitate. Excess 1,2-diaminoethane and 1,4-dioxane was removed under vacuum. The residue was then dissolved in (60 mL) ethyl acetate, washed by saturated  $\text{Na}_2\text{CO}_3$  (3 \* 40 mL). Anhydrous sodium sulfate was added to dry the organic layer followed by filtration. Then the solvent was removed by rotary evaporation and the residue was dried under vacuum, to give colorless oil which was then purified by column chromatography to afford compound **5** (5.2 g, 97.7 % yield).  $^1\text{H}$  NMR ( $\text{CDCl}_3$ , 400 MHz),  $\delta$  (ppm): 4.89 (s, 1H), 3.19 (m, 2H), 2.82 (m, 2H), 1.53 (s, 2H), 1.46 (s, 9H).

***tert-butyl(2-(6-nitro-1,3-dioxo-1H-benzo[de]isoquinolin-2(3H)-yl)ethyl)carbamate***

**(4)**

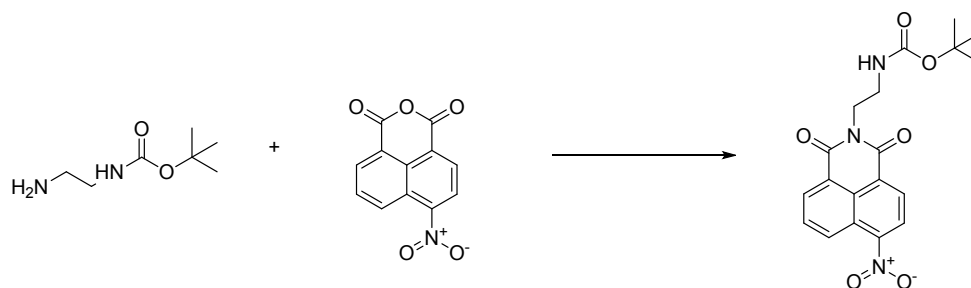

**4**

Compound **5** (160 mg, 1.0 mmol) was added to the solution of 4-nitro-1,8-naphthalic anhydride (125 mg, 0.5 mmol) in 10 mL ethanol. The mixture was refluxed for 3 h and the suspended 4-nitro-1,8-naphthalic anhydride dissolved slowly during the process of the reaction. The reaction mixture was cooled to room temperature and removed the solvent by filtration to afford the desired compound **3** (185 mg, 96.0 %) as yellow solid. <sup>1</sup>H NMR (400 MHz, CDCl<sub>3</sub>): δ (ppm) 8.83 (d, 1H, J = 8.0 Hz), 8.74 (d, 1H, J = 8.0 Hz), 8.70 (d, 1H, J = 8.0 Hz), 8.41 (d, 1H, J = 8.0 Hz), 7.99 (t, 1H, J = 8.0 Hz), 4.93 (br, 1H), 4.38 (t, 2H, J = 5.6 Hz), 3.50–3.60 (m, 2H), 1.25 (s, 9H).

***N*-(9-(4-carboxyphenyl)-6-(dimethylamino)-3H-xanthen-3-ylidene)-*N*-methylethaniminium (2)**

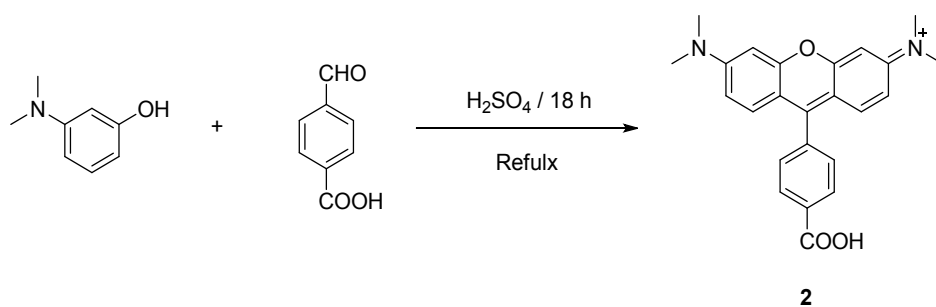

4-formylbenzoic acid (5.472 g, 36.44 mmol) was added to a stirred solution of concentrated sulfuric acid (55 mL) and deionized water (40 mL) at room temperature. The mixture was then heated to 180 C within 2 hours under nitrogen atmosphere, during which 3-(dimethylamino) phenol (10.063 g, 73.45 mmol) was slowly added. After refluxed for 18 h at 180 C, the solution was cooled to r.t. and poured into ice water. NaOH solution (5 M) was added to adjust the pH of the mixture about 6-7 to obtain a

large amount of precipitate. The crude product was filtered, washed with water to get the purple crude product which was then dissolved in 200 mL ethanol. The solution was filtered to remove the insoluble inorganic salt. After removal of ethanol under vacuum, the residue was purified by column chromatograph to give compound **2** as orange powder which was used in the next reaction without further purification.

***N*-(6-(dimethylamino)-9-(4-((2-(6-nitro-1,3-dioxo-1*H*-benzo[de]isoquinolin-2(3*H*)-yl)ethyl)carbamoyl)phenyl)-3*H*-xanthen-3-ylidene)-*N*-methylmethanaminium (1)**

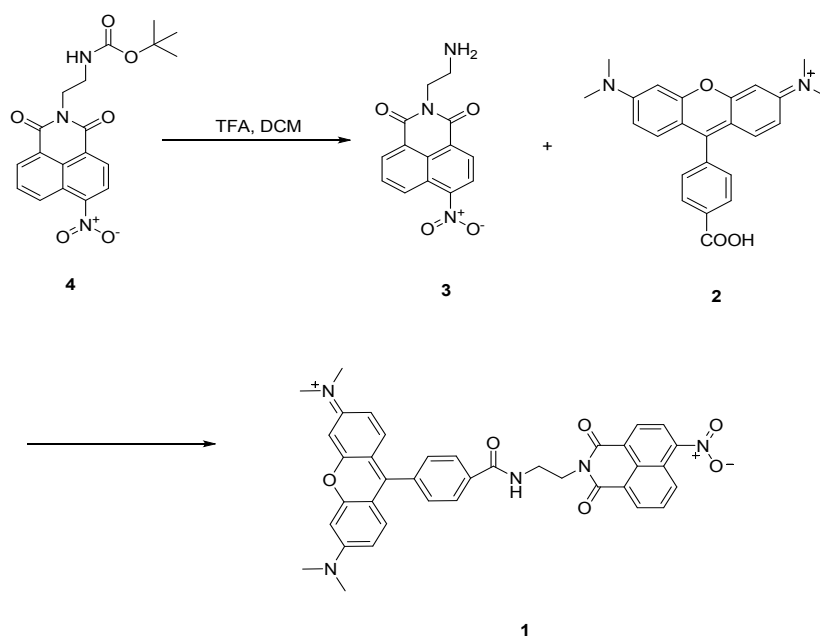

Compound **4** (185 mg, 0.48 mmol) was dissolved in dichloromethane (10 mL), to which trifluoroacetic acid (TFA, 20 mL) was slowly added at 0 °C. The solution was then reacted for 1.5 h at room temperature. After reaction, excess TFA was removed under vacuum and NaOH solution was added to adjust the pH of the mixture to 7-8. The residue was then extracted by dichloromethane, dried with anhydrous sodium sulfate and concentrated to compound **3**, which was directly used in the next reaction.

Compound **2** (186 mg, 0.48 mmol) was dissolved in 10 mL DMF containing EDCI (468 mg) and HOBT (308 mg). Compound **3** (137 mg, 0.48 mmol) pre-dissolved in DMF (6 mL) was added into the above reaction mixture, which was then stirred at 50 °C for 12 hours. After that, DMF was removed under vacuum and the residue was purified by column chromatograph to give the final compound **1** as purple solid (245 mg, 78 %). <sup>1</sup>H NMR (400 MHz, CDCl<sub>3</sub>): δ (ppm) 8.79 (d, 1H, J = 8.0 Hz), 8.73 (d, 1H, J = 4.0 Hz), 8.68 (d, 1H, J = 8.0 Hz), 8.53 (m, 1H), 8.36 (d, 1H, J = 8.0 Hz), 8.08 (d, 2H, J = 8.0 Hz), 7.93 (t, 1H, J = 8.0 Hz), 7.38 (d, 4H, J = 8.0 Hz), 6.93 (d, 2H, J = 8.0 Hz), 6.81 (d, 2H, J = 4.0 Hz), 4.58 (m, 2H), 3.98 (m, 2H), 3.32 (s, 12H). TOF-MS: [M]<sup>+</sup> 654.2347; found 654.2349.

#### **4. Oxygen release *in vitro***

**Cell viability:** CaOV<sub>3</sub> cells were cultured in DMEM low glucose medium containing 10 % fetal bovine serum (FBS) and 1 % penicillin/streptomycin at 37 °C under 5 % CO<sub>2</sub>. Hypoxic Condition for CaOV<sub>3</sub> cell line was prepared under 93 % N<sub>2</sub> and 2 % O<sub>2</sub> in incubator. To carry out photodynamic therapy of cancer cells, CaOV<sub>3</sub> cells were collected through centrifugation and diluted to a density of 1\* 10<sup>4</sup> cells/mL in the DMEM low glucose medium and then seeded onto 96-well plates (100 μL per well). After 24 h culturing, RBCmv was added to the culture medium with five parallel wells for each concentration (0 ~ 500 μg/mL). Finally, after 24 h incubation, biocompatibility was evaluated by CCK-8 assay. For elevating O<sub>2</sub> release for chemotherapy enhancement experiment, a power adjustable 980-nm fiber laser was



collimated and employed as area light source to irradiate the CaOV<sub>3</sub> cells after cellular uptake of RBCmv with 4 h in hypoxia condition. After 10 min exposure of 980-nm light at different power densities, the cells were allowed to incubate for an additional 2 h. Cell viability was measured by a CCK-8 kit. Cell viability of PTX, PBS and only RBCmv was also evaluated.

***Dissolved O<sub>2</sub> detection:*** The  $\Delta$ dissolved O<sub>2</sub> was detected by dissolved oxygen meter. RBCmv (100  $\mu$ g/ml) and RBC were dispersed in hypoxia simulate buffer, respectively. Then they were irradiated with 980-nm laser for different times. RBCmv in normoxia simulated buffer and RBCmv- in hypoxia condition were also carried out at the same time. Finally, the solution was collected and sealed for the dissolved O<sub>2</sub> concentration detection with dissolved oxygen meter.

***PI staining of CaOV<sub>3</sub> cells apoptosis/necrosis:*** For apoptosis/necrosis observation,  $5 \times 10^4$  cells were seeded in cell culture dish, after 24 h culturing in hypoxia condition, RBCmv (250  $\mu$ g/ml) was added into fresh medium and incubated for another 12 h. Then cells were treated with 980-nm NIR laser for 10 min. Finally, after another 2 h incubation, cells were stained by PI for 30 min and observed by CLSM. Other CLSM images of tumor cells after different treatments were also studied by PI staining and CLSM observing under the same conditions.

## **5. Photoacoustic imaging *in vivo***

***Animal model:*** All the animal procedures were in agreement with the guidelines of the Institutional Animal Care and Use Committee of Chinese Academy of Science

and performed in accordance with institutional guidelines on animal handling. CaOV<sub>3</sub> mouse tumor was sheared into tissue blocks with size as 1mm\*1mm\*1mm and resuspended in sterile PBS. These tissues were implanted subcutaneously into the right arm of 5 weeks old female nude mice.

***Photoacoustic imaging in vivo:*** The vascular saturated oxygen was evaluated by multispectral photoacoustic imaging on the VisualSonics LAZR and Vevo 2100 Photoacoustic CT Scanner. After exposed with 980-nm NIR for 10 min, oxygenated hemoglobin and total hemoglobin were measured at excitation wavelength of 850 and 750 nm after injected with pure RBC (200  $\mu$ L) and RBCmv (8 mg/mL, 200  $\mu$ L). The vascular saturated oxygen of another two groups of RBCmv and pure RBC without NIR laser exposure were also carried out under the same conditions.

## Part B: Supplementary Figures

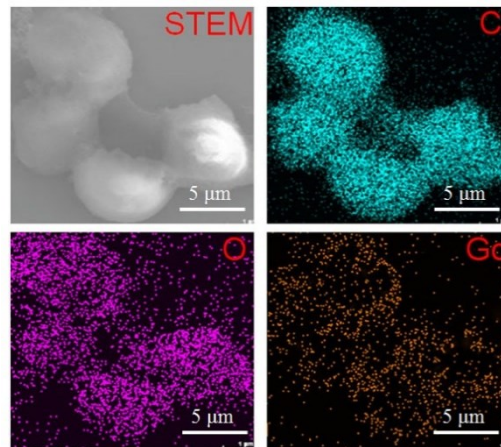

**Figure S1** Elemental mapping results of RBC micro-vehicles. The samples were dehydrated by ethanol with different concentration.

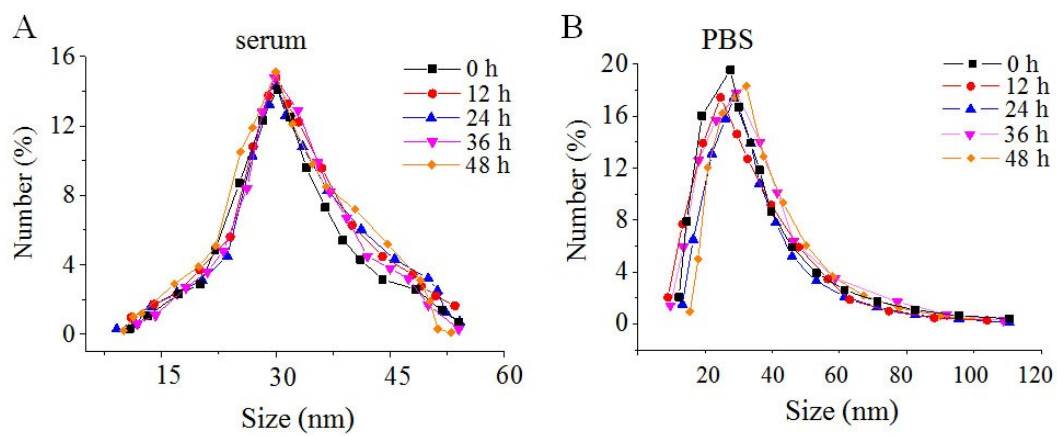

**Fig. S2** Size distribution of RBCmv incubated in PBS (A) and Plasma (B) for different hours.

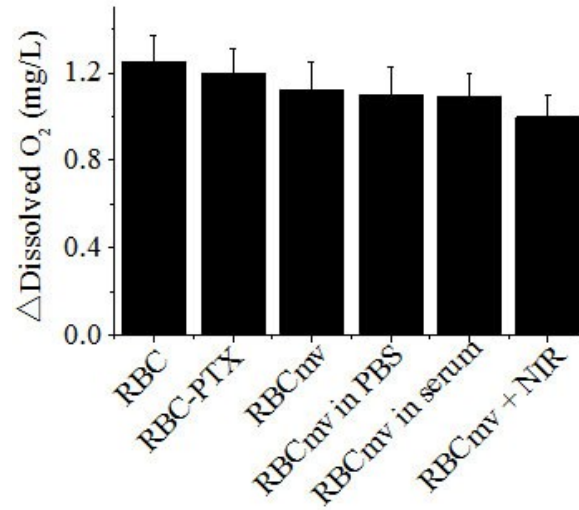

**Fig. S3** The  $\Delta$ dissolved  $O_2$  concentration of RBCs in different samples after stepwise functionalization.

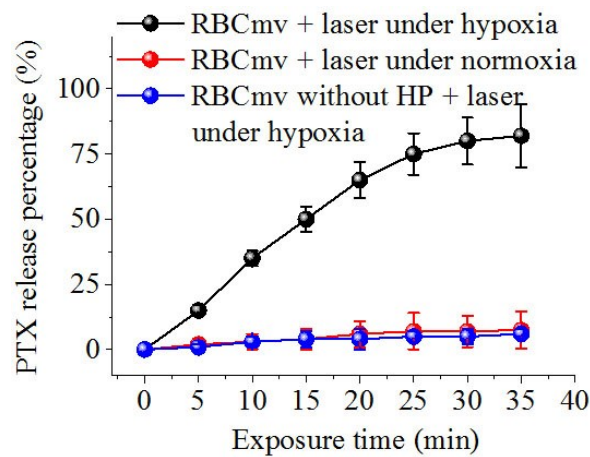

**Figure S4** *In vitro* estimation of PTX release of RBCmv in hypoxia and normoxia stimulated buffer fluid, RBCmv without HP fabrication in simulated hypoxia as the function of 980-nm laser irradiation time.

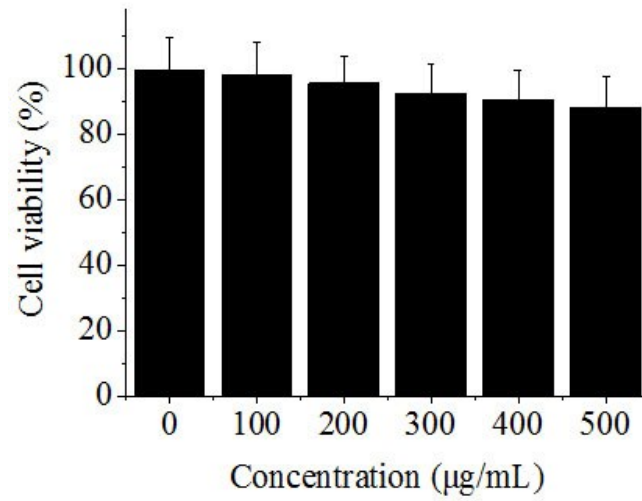

**Fig. S5** Cell viability of CaOV<sub>3</sub> after incubating with RBCmv with different concentration for 24 hours.

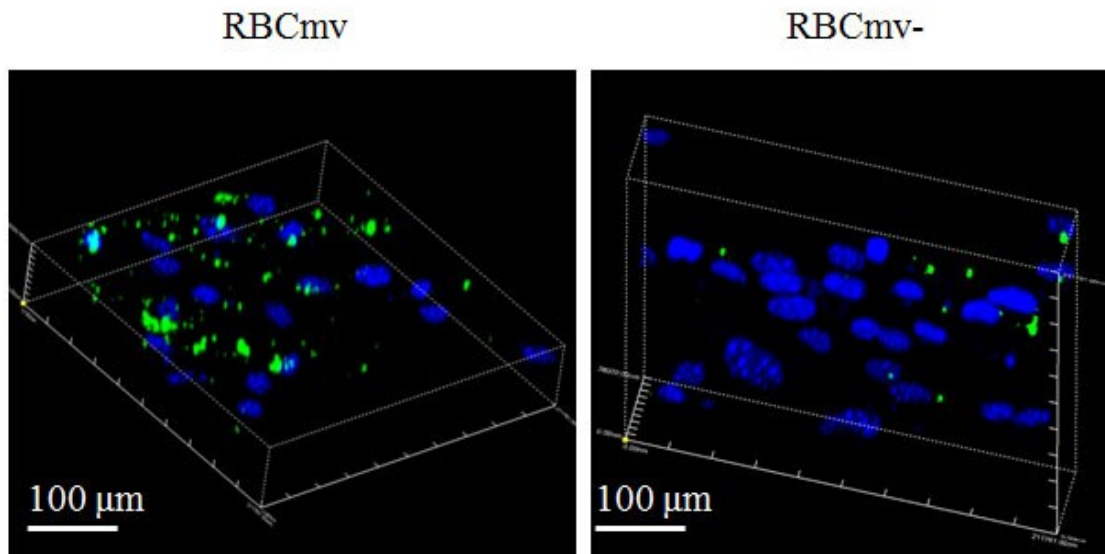

**Fig. S6** 3D CLSM images of hypoxia CaOV<sub>3</sub> cells after co-incubation with RBCmv and RBCmv-.

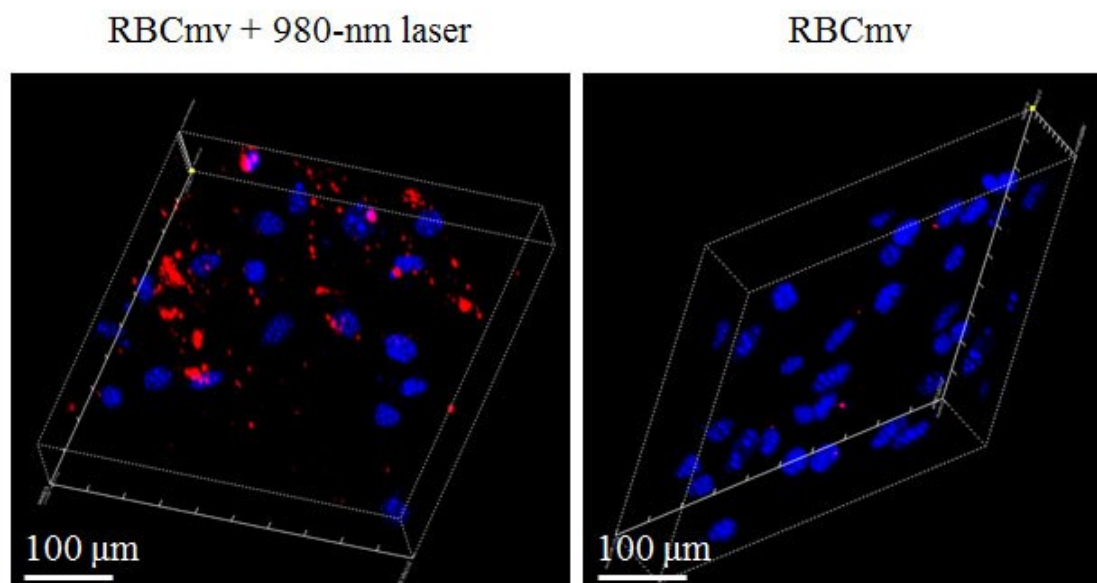

**Fig. S7** 3D CLSM images of O<sub>2</sub> release in hypoxia CaOV<sub>3</sub> after co-incubation of RBCmv with and without exposure to 980-nm laser for 10 min.

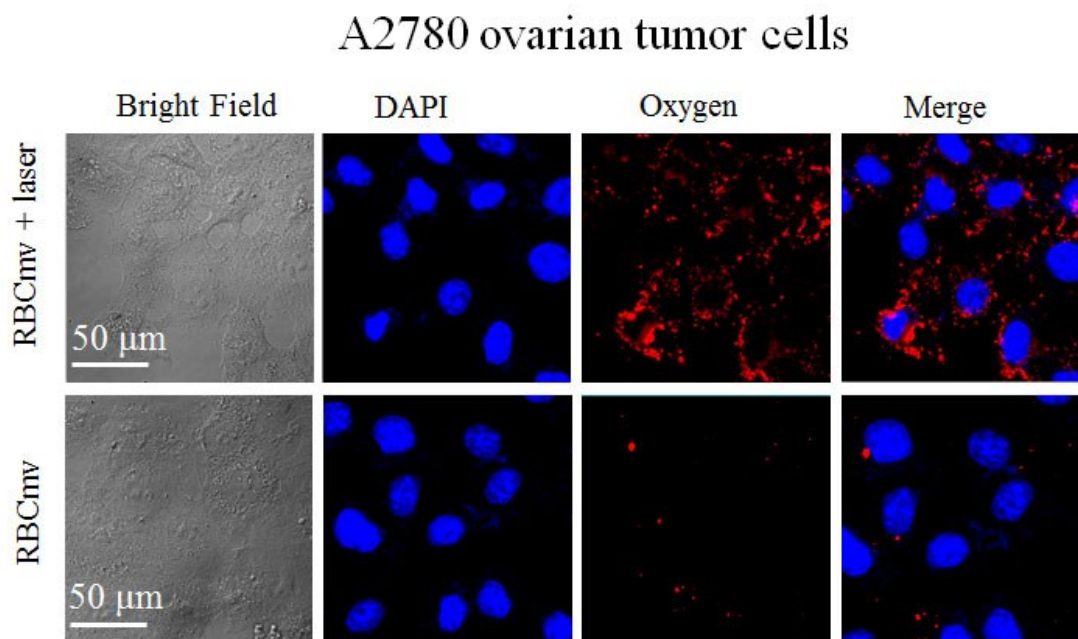

**Fig. S8** O<sub>2</sub> release in hypoxic A2780 ovarian tumor cells after incubation with RBCmv for 4 h. Tris(4,7-diphenyl-1,10-phenanthroline) ruthenium(II) dichloride ( $\text{Ru}(\text{dpp})_3^{2+}$ ) was the oxygen indicator which can be quenched by O<sub>2</sub>. CLSM images in RBCmv + laser group were obtained after exposure to 980-nm NIR laser for 10 min.

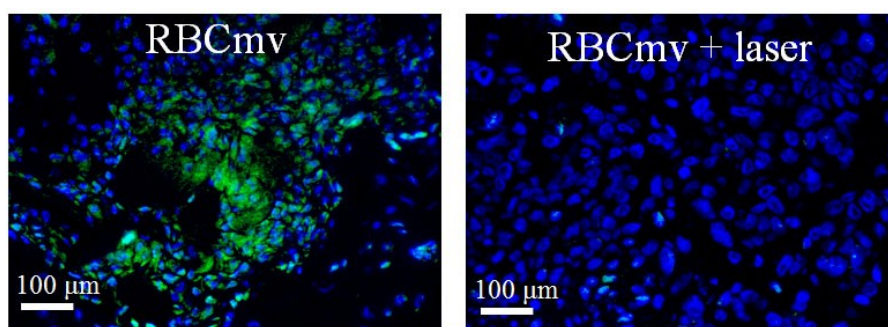

**Figure S9** HIF-1 $\alpha$  expression detected by immunofluorescence staining after RBCmv incubation with/without 980-nm laser irradiation for 30 min.

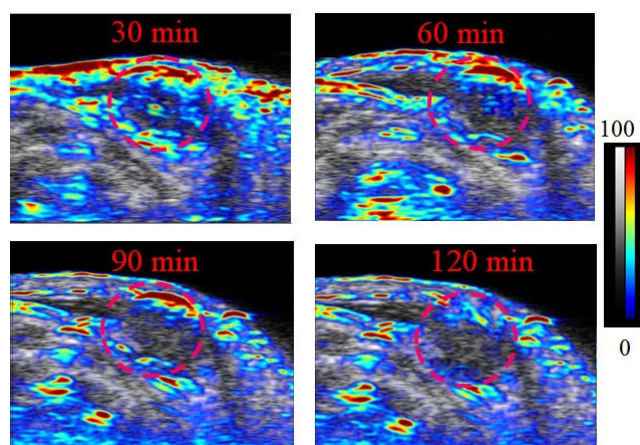

**Figure S10** Photoacoustic images of vascular saturated O<sub>2</sub> in CaOV<sub>3</sub> subcutaneous solid tumors after different minutes of 980 nm laser irradiation at 12 h post-injection of RBCmv.



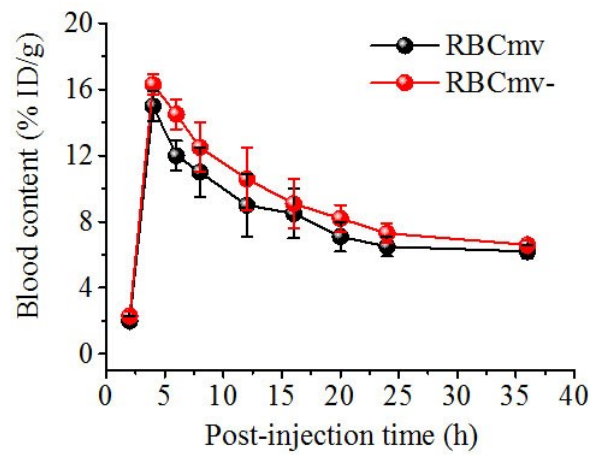

**Figure S11** Blood distribution investigation after intravenous injection of RBCmv and RBCmv- for various periods.

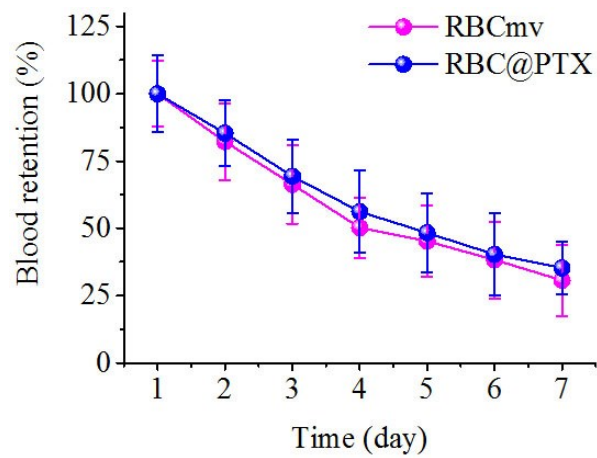

**Figure S12** Blood retention of RBCmv and RBC@PTX at different days after the tail injection.



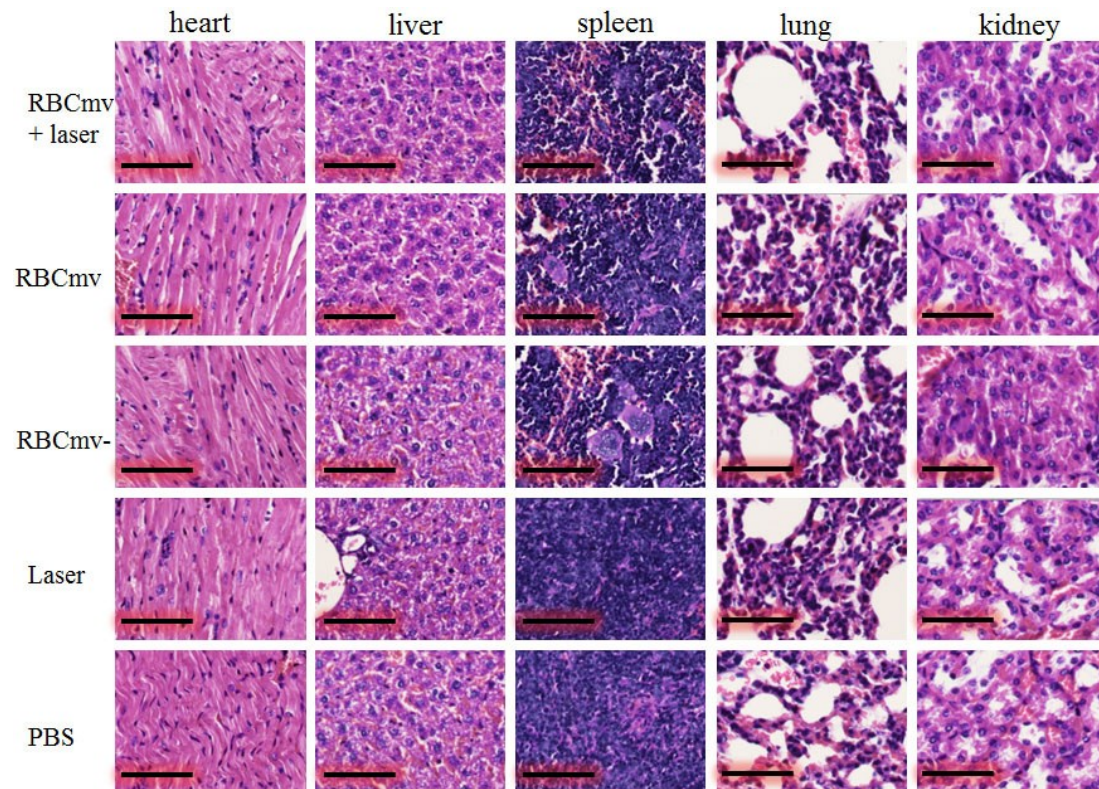

**Fig. S13** H & E staining of organs (heart, liver, spleen, lung, and kidney) which were harvest after different treatments. Scale bars represent 200  $\mu$ m.

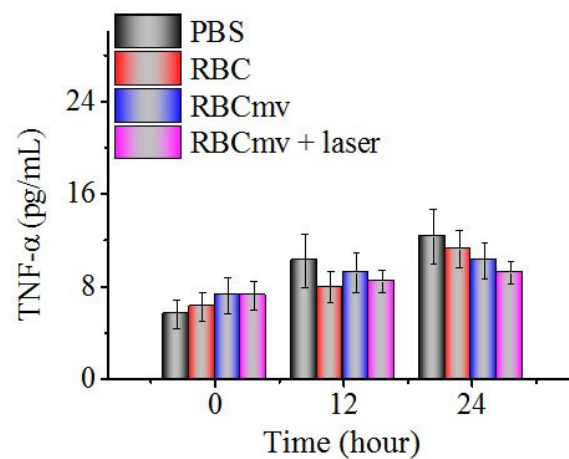

**Figure S14** TNF- $\alpha$  level in blood after treatment of PBS, RBC, RBCmv and RBCmv + laser for 0 h, 12 h and 24 h post-injection.

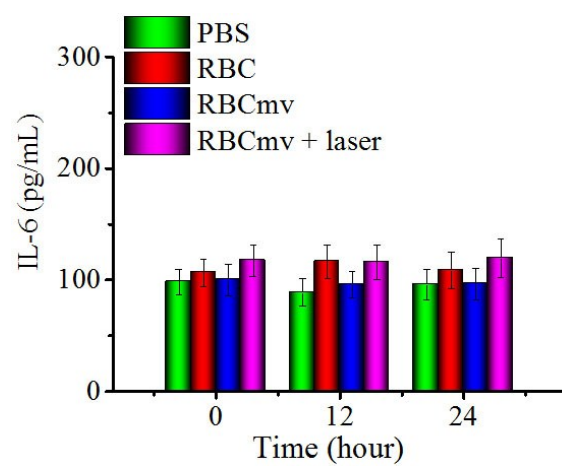

**Figure S15** IL-6 level in blood after treatment of PBS, RBC, RBCmv and RBCmv + laser for 0 h, 12 h and 24 h post-injection.
